# Supplementary material
Source: PubMed Central journal article supplement (PMC4874510)
Supplement: NIHMS365467-supplement-2_si_002.pdf [file NIHMS365467-supplement-2_si_002.pdf]

**Supplemental Information Table 1.** Summary of spectra and proteins in each of the protein collection that were identified as tomato and the number that were identified as *B. cinerea* proteins.

|                                    | <b>Infected MG</b> | <b>Infected RR</b> | <b>Infected <i>rin</i></b> |
|------------------------------------|--------------------|--------------------|----------------------------|
| <b>Total MS/MS spectra</b>         | 1623               | 7560               | 5583                       |
| <b>Tomato spectra</b>              | 1196 (74%)         | 6711 (89%)         | 4847 (87%)                 |
| <b><i>B. cinerea</i> spectra</b>   | 427 (26%)          | 849 (11%)          | 736 (13%)                  |
| <b>Total proteins (&lt;1% FDR)</b> | 163                | 497                | 421                        |
| <b>Tomato proteins</b>             | 119 (73%)          | 456 (92%)          | 374 (89%)                  |
| <b><i>B. cinerea</i> proteins</b>  | 44 (27%)           | 41 (8%)            | 47 (11%)                   |
